# Supplementary material
Source: HighWire-hosted journal article supplement (http://www.qdcxjkg.com/highwire/filestream/114071/field_highwire_adjunct_files/0/ERJ-01991-2012_Disclosures.pdf)
Supplement: ERJ-01991-2012_Disclosures.pdf [file ERJ-01991-2012_Disclosures.pdf]

**D.A. Spencer** has received an unrestricted research grant from Pfizer (formerly Wyeth Vaccines UK) for the UK-ESPE study (Enhanced Surveillance of Paediatric Empyema) which has funded the employment of a research fellow. He has received financial support with travel costs to attend educational meetings from Pfizer and GSK. Biologicals. He has received honoraria from GSK and Wyeth for lectures at educational meetings.

**J.E. Clark** has received an unrestricted grant from Pfizer (formerly Wyeth Vaccines UK) to support the community acquired pneumonia study in North East England 2008-2011.

**K.M. Eastham** received funding from Pfizer (formerly Wyeth Vaccines UK) to attend the ESPID Annual Meeting 2011.
